# Supplementary material for: Electroporation and genetic supply of Cas9 increase the generation efficiency of CRISPR/Cas9 knock-in alleles in C57BL/6J mouse zygotes
Source: PubMed Central journal article supplement (PMC7578782; doi:10.1038/s41598-020-74960-7), 2020-10-21
Supplement: 41598_2020_74960_MOESM1_ESM.pdf [file 41598_2020_74960_MOESM1_ESM.pdf]

**Electroporation and genetic supply of Cas9 increase the generation efficiency of CRISPR/Cas9 knock-in alleles in C57BL/6J mouse zygotes**

Samy Alghadban<sup>1,3</sup>, Amine Bouchareb<sup>1,3</sup>, Robert Hinch<sup>2</sup>, Polinka Hernandez-Pliego<sup>1</sup>, Daniel Biggs<sup>1</sup>, Chris Preece<sup>1</sup> and Benjamin Davies<sup>1\*</sup>

<sup>1</sup>Wellcome Centre for Human Genetics, University of Oxford, Roosevelt Drive, Oxford, OX3 7BN UK

<sup>2</sup>Big Data Institute, Li Ka Shing Centre for Health Information and Discovery, University of Oxford, Oxford, OX3 7LF UK

<sup>3</sup> contributed equally to the work

\* to whom correspondence should be addressed

| Cas9 conc.<br>(ng/ $\mu$ l) | No.<br>Exp | HDR | Cas9<br>source | No.<br>harvested | No.<br>used | No.<br>survived | No.<br>2-cell | 2-cell % | No.<br>blast <sup>h</sup> | Blast/<br>survived % | blast/<br>2-cell % | HDR | Mut | Total<br>analysed |
|-----------------------------|------------|-----|----------------|------------------|-------------|-----------------|---------------|----------|---------------------------|----------------------|--------------------|-----|-----|-------------------|
| 650                         | 2          | HDR | pCas9          | 254              | 109         | 95              | 68            | 71.6%    | 24                        | 25.26%               | 35.29%             | 10  | 19  | 24                |
| 400                         | 2          | HDR | pCas9          | 237              | 104         | 89              | 56            | 62.9%    | 22                        | 24.72%               | 39.29%             | 9   | 16  | 22                |
| 200                         | 2          | HDR | pCas9          | 239              | 136         | 117             | 70            | 59.8%    | 21                        | 17.95%               | 30.00%             | 9   | 11  | 21                |
| 100                         | 2          | HDR | pCas9          | 240              | 150         | 137             | 72            | 52.5%    | 32                        | 23.36%               | 44.44%             | 22  | 28  | 32                |

**Supplementary Table 1: Optimization of the Cas9 concentration used for pronuclear microinjection.** Table shows the mutation rate and the production statistics following pronuclear microinjection of RNP/ssODN into C57BL/6J zygotes, using Cas9 concentrations varying from 100 ng/ $\mu$ l up to the concentration used in the electroporation experiments (650 ng/ $\mu$ l). <sup>h</sup>: Harvested at the blastocyst stage for analysis of genotypes; pCas9 (Cas9 protein).

| Target Locus | Rep. colour | Protospacer 5'-3'    | Genomic coordinates                | Forward Genotyping Primer  | Reverse Genotyping Primer |
|--------------|-------------|----------------------|------------------------------------|----------------------------|---------------------------|
| Gene A       |             | GATGGTGATGGTGCGCCAGG | Chr19: 6,276,725-6,300,096 (+)     | ACTCCCCTGCTTGGATAGTCT      | CCTTGTCCACATCTGCCAAC      |
| Gene B       |             | GTGCCTCGTAGTCATCACAC | Chr19: 27,322,588-27,337,179 (+)   | CTCACAAGCCTCCTGGATGG       | TCCATAGAAGCGCATGTCCC      |
| Gene C       |             | GCATGCCTTCAGGCTGACAT | Chr18: 1,438,983-1,483,170 (+)     | CTGGCAAAGTCCTGCAGTTG       | ACATTGGTCCCTATGGTGGT      |
| Gene D       |             | GGGGTAGGAAGTGCACCAAC | Chr19: 51,440,203-51,441,340 (+)   | GCTCAGCCAAAGATGAAGAAGGTC   | TTCCTCCCAGCTCCAGTTGTTCCA  |
| Gene E       |             | CCCAGGCCAACAGCCATGG  | Chr10: 131,984,081-131,989,316 (+) | CAGGGAAGGCTGCGAAGG         | CGAATGGTTGGGTCACCAGA      |
| Gene F       |             | CATGGTGCAGGACATTTAC  | Chr17: 15,543,079-15,564,354 (-)   | AGGAATCTTCCTTCC TTGCTGTCTG | ATTTCCCTGTATCTTCTCAGGACT  |
| Gene G       |             | CTGCAGTCGGCCGAAGCTGA | Chr9: 111,228,228-111,271,791 (-)  | CTCTCAGTCGGGAACTCGG        | AATAGGAAGAGCGGACCGTG      |
| Gene H       |             | ACGGCTGCAAGGGTTCTTC  | Chr2: 167,587,166-167,653,303 (+)  | AACCTCAATTCATCCAACAGCC     | TTATAGTACAGGCTTGCCATGGA   |
| Gene I       |             | GGGCCTGTGTGATGACTACG | Chr19: 27,322,588-27,337,179 (+)   | CTCACAAGCCTCCTGGATGG       | TCCATAGAAGCGCATGTCCC      |
| Gene J       |             | AGTGCTGACTGTAGCATGTG | Chr 6: 115,978,186-115,978,784 (-) | CATGCGCACTCCACTTAGGA       | GCAGGTGGAGTGTACCTCAC      |

**Supplementary Table 2:** Targets for CRISPR/Cas9 mutagenesis together with their genomic coordinates and the primer sequences used for genotyping

| Target Locus | Rep. colour | Template length (nt) | Template sequence                                                                                                                                 | Restriction enzyme |
|--------------|-------------|----------------------|---------------------------------------------------------------------------------------------------------------------------------------------------|--------------------|
| Gene A       |             | 139                  | CCAAGCTGCTGGATACAGTGGATGATATGCTGGCCAACGATATAGCTCGGCTGATGGTGTGGTGTGGCA<br>GGAAGAGTCCCTGATGCCCTCACAGGCTGTGAAGGGTGGTGCTTTTATGGCACCATGAATGGGCCCTT     | EarI               |
| Gene B       |             | 139                  | AAACGCGCCTGGGTCGCCTGGCCACCTCCACCACTCGCAGAGGCCAGCTGGGtCTGTGTGATGACTACTAG<br>GCACAGACAGACGAGTACTTCTTTGACCGTGACCCAGCGGTCTTCCAGCTCATCTACAACCTTCTACAC  | Bfal               |
| Gene C       |             | 139                  | CAAAGGTTTAGTCCGTTATCATTATGGTAGGAAGCATGCCTTCAGGCTGAAGCTTATAACTTCGTATAATGT<br>ATGCTATACGAAGTTATCATTGGAGCAGTAGCTGAAAACACTACATCCTGATCCTTAGGTGGACAGACA | HindIII            |
| Gene F       |             | 139                  | TAGTTACCTCTTCATCCATAGGACCATAGGACCCTGGACCTCTCCAGTGAAATGGCATACCCATACGACGTC<br>CCAGACTACGCTATGTCCTGCACCATGAACACCAACAAGCTGGAAGAAAATAGTCTGAAGAAGATA    | AatII              |
| Gene G       |             | 139                  | AACGCCATATTGGCGCCCGAGTTCAGTCAGCCAATCACTCGAGCTCCTCACGCTCAAGTTCTTCTTTAG<br>CTTCGGCCGACTGCAGTCTGCGCCGTCTTCCAGCGGCAAGTGCTGATTGGGCAGCATGAATGCCA        | HpyAV              |
| Gene H       |             | 139                  | CGACCGGGCCACCGGCAAACACTACGGAGCCTCGAGCTGTGACGGCTGCAAGGGGTTCTTCTGGAGatctG<br>TGAGaAAGAACCACATGTACTCCTGCAGGTGAGGAGCCAGCTCGGGCCTTAACCTTCTCATCTGGGAT   | BglII              |

**Supplementary Table 3:** ssODN repair templates and the diagnostic restriction enzyme using for detection of a successful knock-in mutation

| Gene ID | No. exp | HDR | Delivery mode   | Cas9 source | No. harvested | No. used | No. survived | No. 2-cell | 2-cell % | No. Transfers* | Pups born %                 |   | HDR            | Mut | Total analysed |
|---------|---------|-----|-----------------|-------------|---------------|----------|--------------|------------|----------|----------------|-----------------------------|---|----------------|-----|----------------|
|         |         |     |                 |             |               |          |              |            |          |                | No. pups/ No.transferred(%) |   |                |     |                |
| Gene A  | 2       | HDR | EP <sup>a</sup> | pCas9       | 255           | 255      | 253          | 157        | 62.1%    | 3              | 6/76(7.9)                   | 0 | 6              | 6   |                |
| Gene A  | 3       | HDR | EP <sup>a</sup> | embryos     | 266           | 266      | 262          | 154        | 58.8%    | 5              | 17/129(13.2)                | 4 | 16             | 17  |                |
| Gene B  | 1       | HDR | PNI             | pCas9       | 120           | 83       | 72           | 34         | 47.2%    | 1              | 6/34 (17.6)                 | 0 | 2              | 6   |                |
| Gene B  | 2       | HDR | EP <sup>a</sup> | pCas9       | 216           | 216      | 203          | 127        | 62.6%    | 5              | 24/118 (20.3)               | 2 | 10             | 24  |                |
| Gene B  | 2       | HDR | EP <sup>a</sup> | embryos     | 158           | 158      | 154          | 96         | 62.3%    | 2              | 10/66 (15.2)                | 1 | 1 <sup>c</sup> | 10  |                |
| Gene C  | 2       | HDR | PNI             | pCas9       | 271           | 112      | 104          | 79         | 76.0%    | 3              | 17/82 (20.7)                | 1 | 2              | 17  |                |
| Gene C  | 1       | HDR | EP <sup>a</sup> | pCas9       | 180           | 180      | 180          | 83         | 46.1%    | 2              | 4/66 (6.1)                  | 1 | 3              | 4   |                |
| Gene D  | 2       | HDR | PNI             | pCas9       | 374           | 208      | 145          | 91         | 62.8%    | 3              | 18/92 (19.6)                | - | 1              | 18  |                |
| Gene D  | 2       | HDR | EP <sup>b</sup> | pCas9       | 230           | 230      | 219          | 86         | 39.3%    | 3              | 11/81 (13.6)                | - | 1              | 11  |                |
| Gene E  | 1       | HDR | PNI             | pCas9       | 254           | 161      | 143          | 120        | 83.9%    | 4              | 21/120 (17.5)               | - | 8              | 21  |                |
| Gene E  | 1       | HDR | EP <sup>a</sup> | pCas9       | 124           | 124      | 124          | 87         | 70.2%    | 3              | 21/76 (27.6)                | - | 10             | 21  |                |
| Gene E  | 1       | HDR | EP <sup>a</sup> | embryos     | 64            | 64       | 63           | 40         | 63.5%    | 1              | 6/26 (23.1)                 | - | 3              | 6   |                |
| Gene F  | 1       | HDR | PNI             | pCas9       | 273           | 224      | 185          | 136        | 73.5%    | 3              | 22/90 (24.4)                | 1 |                | 22  |                |
| Gene F  | 1       | HDR | EP <sup>a</sup> | pCas9       | 50            | 50       | 50           | 31         | 62.0%    | 1              | 11/34 (32.4)                | 1 | -              | 11  |                |
| Gene F  | 1       | HDR | EP <sup>a</sup> | embryos     | 132           | 132      | 130          | 62         | 47.7%    | 2              | 13/66 (19.7)                | 6 | 7              | 13  |                |

**Supplementary Table 4: Genotypes of pups at several targeted loci with different delivery methods.** Table summarizing production and genotyping data of pups generated by delivery of CRISPR/Cas9 reagents either by pronuclear microinjection (PNI) or electroporation (EP) into C57BL/6J zygotes using protein Cas9 (pCas9)/ssODN, or electroporation of zygotes derived from Cas9-expressing donor females (embryos) with sgRNA/ssODN. \*Number of transfers is equal to the number of pregnant females. <sup>a</sup> Electroporation using a 1mm slide; <sup>b</sup> Electroporation in a 1mm cuvette; <sup>c</sup> Only 2 of the 10 pups have been assessed for mutagenesis.

| Gene ID | No. exp | HDR | Delivery mode | Cas9 source | No. harvested | No. used | No. survived | No. 2-cell | 2-cell % | No. blast <sup>h</sup> | Blast/survived % | Blast/2-cell % | HDR | Mut | Total analysed  |
|---------|---------|-----|---------------|-------------|---------------|----------|--------------|------------|----------|------------------------|------------------|----------------|-----|-----|-----------------|
| Gene A  | 4       | HDR | PNI           | pCas9       | 597           | 355      | 295          | 143        | 48.5%    | 65                     | 22.0%            | 45.5%          | 20  | 28  | 65 <sup>a</sup> |
| Gene A  | 4       | HDR | EP            | pCas9       | 302           | 302      | 280          | 175        | 62.5%    | 119                    | 42.5%            | 68.0%          | 56  | 89  | 119             |
| Gene A  | 2       | HDR | EP            | embryos     | 134           | 134      | 134          | 79         | 59.0%    | 53                     | 39.6%            | 67.1%          | 27  | 49  | 53              |
| Gene B  | 1       | No  | EP            | embryos     | 29            | 29       | 29           | 18         | 62.1%    | 9                      | 31.0%            | 50.0%          | -   | 7   | 9               |
| Gene B  | 3       | HDR | EP            | embryos     | 179           | 179      | 175          | 131        | 74.9%    | 44                     | 25.1%            | 33.6%          | -   | 33  | 43              |
| Gene G  | 1       | No  | EP            | pCas9       | 100           | 100      | 97           | 40         | 41.2%    | 31                     | 32.0%            | 77.5%          | -   | 30  | 31              |
| Gene G  | 1       | HDR | EP            | pCas9       | 83            | 83       | 79           | 50         | 63.3%    | 26                     | 32.9%            | 52.0%          | 9   | 17  | 26              |
| Gene G  | 1       | No  | EP            | embryos     | 30            | 30       | 30           | 15         | 50.0%    | 11                     | 36.7%            | 73.3%          | -   | 8   | 11              |
| Gene G  | 1       | HDR | EP            | embryos     | 104           | 104      | 102          | 76         | 74.5%    | 40                     | 39.2%            | 52.6%          | 21  | 27  | 40              |
| Gene H  | 1       | HDR | EP            | pCas9       | 70            | 70       | 67           | 47         | 70.1%    | 39                     | 58.2%            | 83.0%          | 13  | 25  | 39              |
| Gene H  | 1       | HDR | EP            | embryos     | 104           | 104      | 102          | 73         | 71.6%    | 40                     | 39.2%            | 54.8%          | 16  | 32  | 40              |
| Gene I  | 1       | No  | EP            | pCas9       | 75            | 75       | 65           | 28         | 43.1%    | 21                     | 32.3%            | 75.0%          | -   | 29  | 32              |
| Gene I  | 1       | HDR | EP            | embryos     | 105           | 105      | 99           | 62         | 62.6%    | 37                     | 37.4%            | 59.7%          | -   | 32  | 37              |
| Gene J  | 1       | HDR | EP            | pCas9       | 158           | 158      | 150          | 70         | 46.7%    | 24                     | 16.0%            | 34.3%          | 3   | 22  | 24              |
| Gene J  | 1       | HDR | EP            | Embryos     | 45            | 45       | 44           | 20         | 45.5%    | 12                     | 27.3%            | 60.0%          | 3   | 11  | 12              |

**Supplementary Table 5: Genotypes of blastocysts at several targeted loci with different delivery methods.** Table summarizing production and genotyping data of blastocysts generated by delivery of CRISPR/Cas9 reagents either by pronuclear microinjection (PNI) or electroporation (EP) into C57BL/6J zygotes using protein Cas9 (pCas9)/ssODN, or electroporation of zygotes derived from Cas9-expressing donor females (embryos) with sgRNA/ssODN.

|          | Mutagenesis  |             |                  |             | HDR          |             |                  |             |
|----------|--------------|-------------|------------------|-------------|--------------|-------------|------------------|-------------|
|          | PNI vs EP WT |             | EP WT vs EP Cas9 |             | PNI vs EP WT |             | EP WT vs EP Cas9 |             |
|          | Pups         | Blastocysts | Pups             | Blastocysts | Pups         | Blastocysts | Pups             | Blastocysts |
| p values | 0.0222       | 0.426       | 0.015*           | 0.6543      | 0.3023       | 0.165       | 0.0163           | 0.0461      |

**Supplementary Table 6: Impact of the delivery methods on mutagenesis and HDR efficiency, analysed within experimental group (genotyping of pups or blastocysts).** Summary of statistical analysis, using Chi-square test, of the different delivery methods [pronuclear microinjection (PNI) or electroporation into C57BL/6J zygotes (EP WT) using protein Cas9 (pCas9)/ssODN, or electroporation of zygotes derived from Cas9-expressing donor females (EP Cas9) with sgRNA/ssODN] to establish whether the mode of delivery has any effect on the mutagenesis or knock-in (HDR) rate. This test has been used to perform comparisons on pups and blastocysts separately. In comparing the impact of the delivery methods, it was striking that the above p-values are highly variable within an experiment type (genotyping of blastocysts or genotyping of pups), indeed the variable efficiencies across different gene loci weakens this analysis method (\*in particular). Subsequently for a thorough analysis of this highly structured data, a designed model was developed to take into consideration the experiment type and the gene locus as variables. This model has been used to draw the main conclusions of the study and is presented in **Fig. 6** (please refer to the main text).

| Gene ID | No. exp | Delivery mode     | Cas9 source | No. harvested | No. used | No. survived | No. 2-cell | % 2-cell (total) | % 2-cell (survived) | No. transferred | No. transfers | No. Pregnant (%) | No. Pups born | % born (adjusted for n.p.) | % born per total harvested embryos |
|---------|---------|-------------------|-------------|---------------|----------|--------------|------------|------------------|---------------------|-----------------|---------------|------------------|---------------|----------------------------|------------------------------------|
| Gene B  | 1       | PNI               | pCas9       | 120           | 83       | 72           | 34         | 28.3%            | 47.2%               | 34              | 1             | 1 (100%)         | 6             | 17.65%                     | 5.00%                              |
| Gene C  | 2       | PNI               | pCas9       | 271           | 112      | 104          | 79         | 29.2%            | 76.0%               | 82              | 3             | 3 (100%)         | 17            | 20.73%                     | 6.04%                              |
| Gene D  | 2       | PNI               | pCas9       | 374           | 208      | 145          | 91         | 24.3%            | 62.8%               | 92              | 3             | 3 (100%)         | 18            | 19.57%                     | 4.76%                              |
| Gene E  | 2       | PNI               | pCas9       | 505           | 285      | 248          | 170        | 33.7%            | 68.5%               | 170             | 6             | 5 (83%)          | 33            | 23.29%                     | 7.84%                              |
| Gene F  | 4       | PNI               | pCas9       | 731           | 435      | 349          | 227        | 31.1%            | 65.0%               | 172             | 6             | 5 (83%)          | 30            | 20.93%                     | 6.50%                              |
| Gene H  | 1       | PNI               | pCas9       | 173           | 113      | 95           | 41         | 23.7%            | 43.2%               | 41              | 2             | 2 (100%)         | 8             | 19.51%                     | 4.62%                              |
| Gene I  | 1       | PNI               | pCas9       | 112           | 82       | 76           | 39         | 34.8%            | 51.3%               | 26              | 1             | 1 (100%)         | 1             | 3.85%                      | 1.34%                              |
| Gene A  | 3       | EP <sup>a,b</sup> | pCas9       | 441           | 441      | 430          | 241        | 54.7%            | 56.0%               | 202             | 7             | 4 (57%)          | 15            | 13.00%                     | 7.10%                              |
| Gene B  | 2       | EP <sup>a</sup>   | pCas9       | 216           | 216      | 203          | 127        | 58.8%            | 62.6%               | 118             | 5             | 5 (100%)         | 24            | 20.34%                     | 11.96%                             |
| Gene C  | 1       | EP <sup>a</sup>   | pCas9       | 180           | 180      | 180          | 83         | 46.1%            | 46.1%               | 66              | 2             | 2 (100%)         | 4             | 6.06%                      | 2.79%                              |
| Gene D  | 2       | EP <sup>b</sup>   | pCas9       | 230           | 230      | 219          | 86         | 37.4%            | 39.3%               | 81              | 3             | 3 (100%)         | 11            | 13.58%                     | 5.08%                              |
| Gene E  | 2       | EP <sup>a</sup>   | pCas9       | 327           | 327      | 275          | 198        | 60.6%            | 72.0%               | 119             | 5             | 5 (100%)         | 25            | 21.01%                     | 12.72%                             |
| Gene F  | 2       | EP <sup>a,b</sup> | pCas9       | 195           | 195      | 194          | 80         | 41.0%            | 41.2%               | 74              | 3             | 1 (33%)          | 11            | 44.59%                     | 18.30%                             |
| Gene H  | 1       | EP <sup>a</sup>   | pCas9       | 118           | 118      | 109          | 42         | 35.6%            | 38.5%               | 42              | 2             | 2 (100%)         | 9             | 21.43%                     | 7.63%                              |
| Gene A  | 3       | EP <sup>a</sup>   | embryo      | 266           | 266      | 262          | 154        | 57.9%            | 58.8%               | 129             | 5             | 5 (100%)         | 17            | 13.18%                     | 7.63%                              |
| Gene B  | 2       | EP <sup>a</sup>   | embryo      | 158           | 158      | 154          | 96         | 60.8%            | 62.3%               | 66              | 2             | 2 (100%)         | 10            | 15.15%                     | 9.21%                              |
| Gene E  | 2       | EP <sup>a</sup>   | embryo      | 128           | 128      | 127          | 73         | 57.0%            | 57.5%               | 52              | 2             | 1 (50%)          | 6             | 23.08%                     | 13.16%                             |
| Gene F  | 2       | EP <sup>a,b</sup> | embryo      | 226           | 226      | 212          | 115        | 50.9%            | 54.2%               | 94              | 3             | 2 (67%)          | 13            | 20.74%                     | 10.56%                             |

**Supplementary Table 7: Impact of the delivery method on the production of live pups.** Summary table for the embryo transfer statistics following delivery of CRISPR/Cas9 reagents either by pronuclear microinjection (PNI) or electroporation (EP) into C57BL/6J zygotes using protein Cas9 (pCas9)/ssODN, or electroporation of zygotes derived from Cas9-expressing donor females (embryos) with sgRNA/ssODN. This table includes extra data from pups that have not been genotyped (not shown in Supplementary Table 4). <sup>a</sup> Electroporation on slide; <sup>b</sup> Electroporation in cuvette; n.p. not pregnant



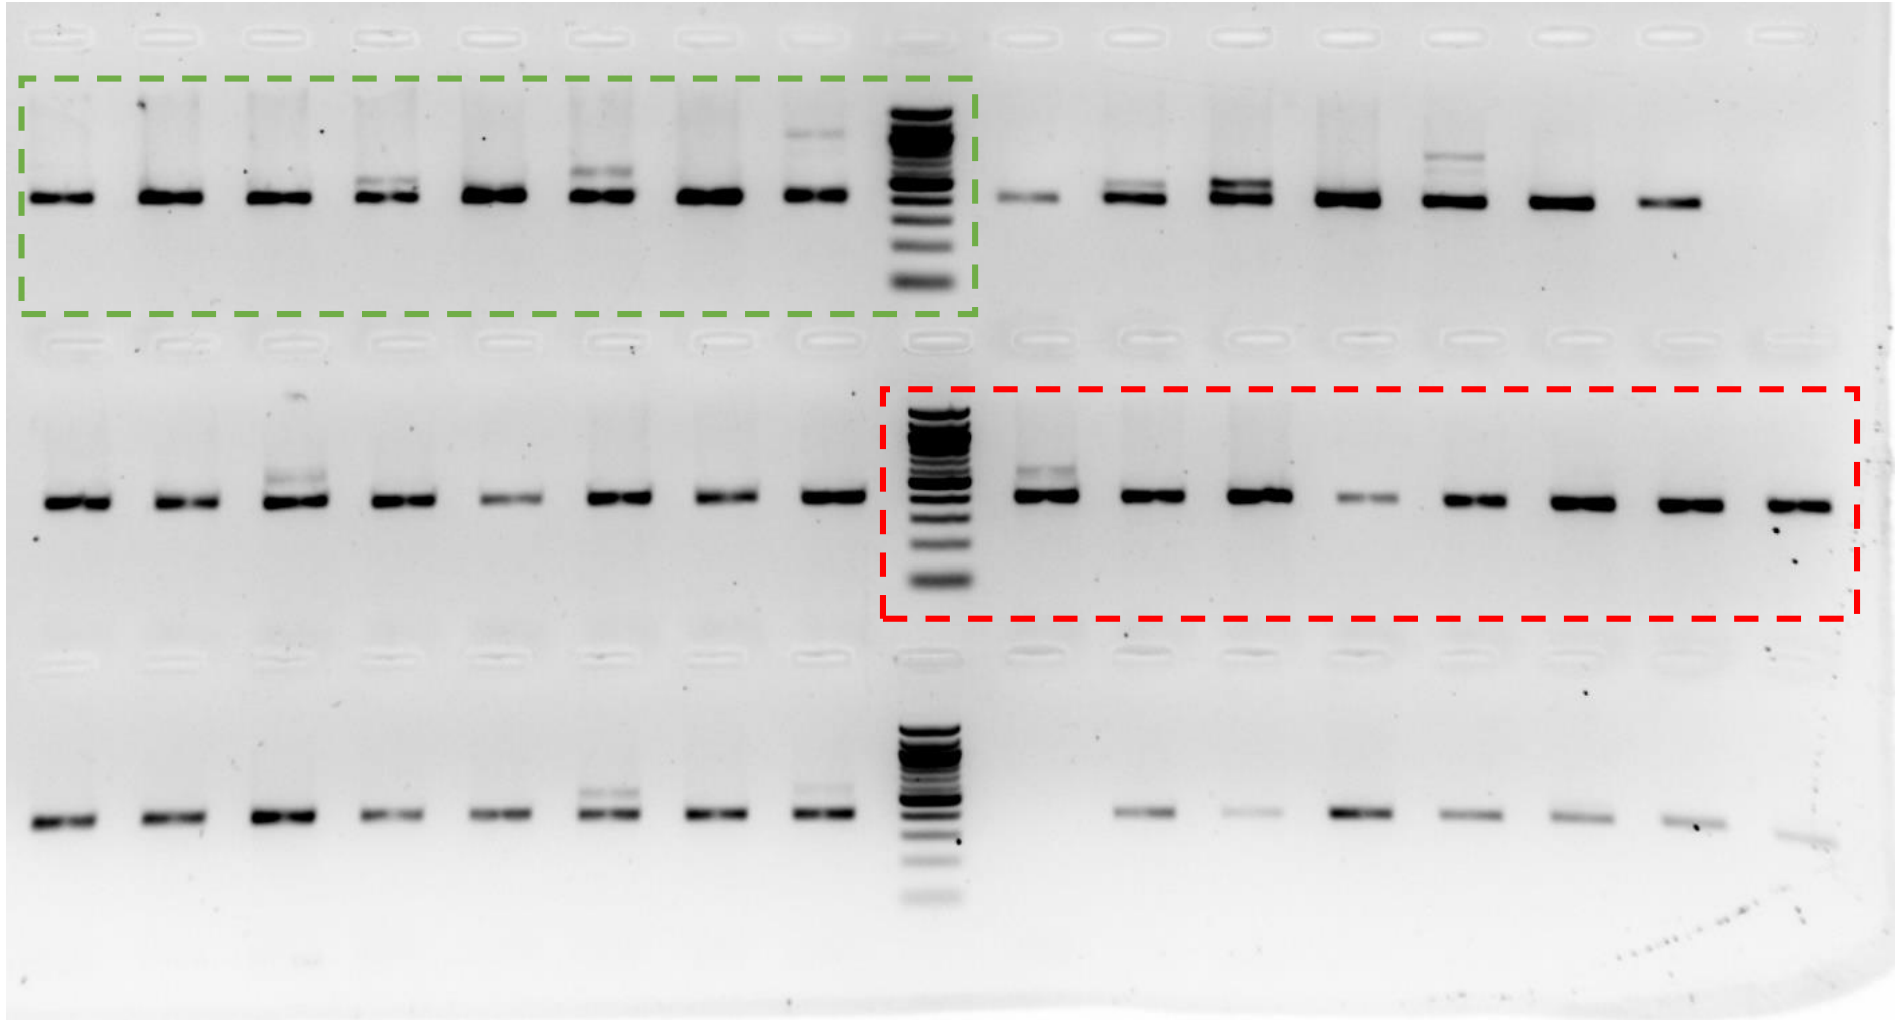

Original gel for Figure 1 (top panel) "PCR gel 2% Agarose"  
2 examples are shown – left hand portion is shown above in red  
outline, right hand portion is shown above in green outline

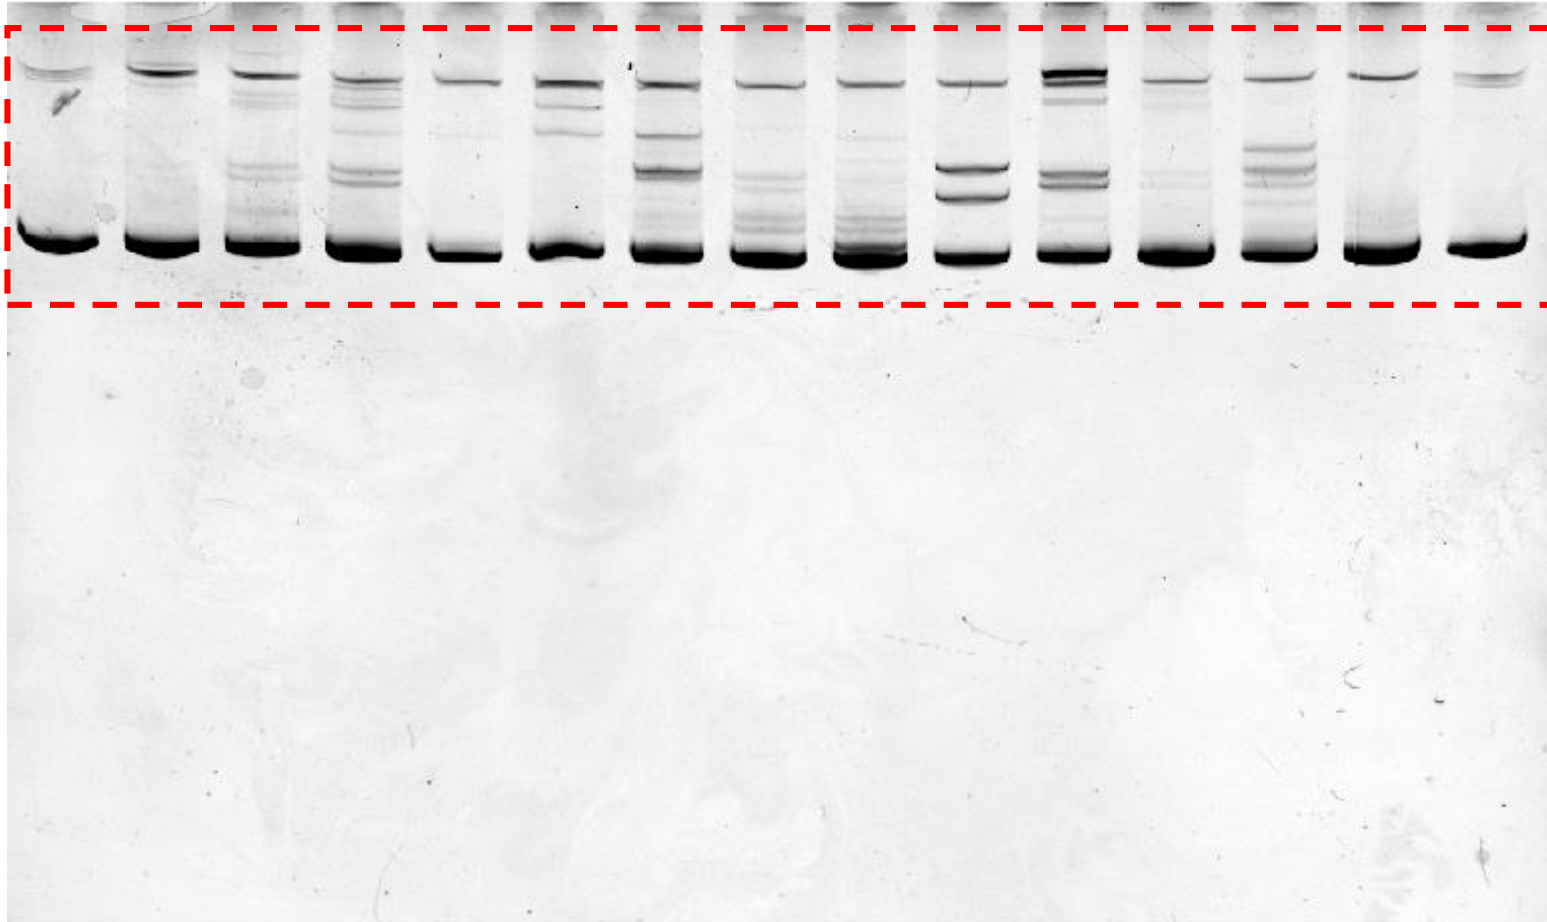

Original gel for Figure 1 (middle panel) "Heterodimers 15% PAGE"

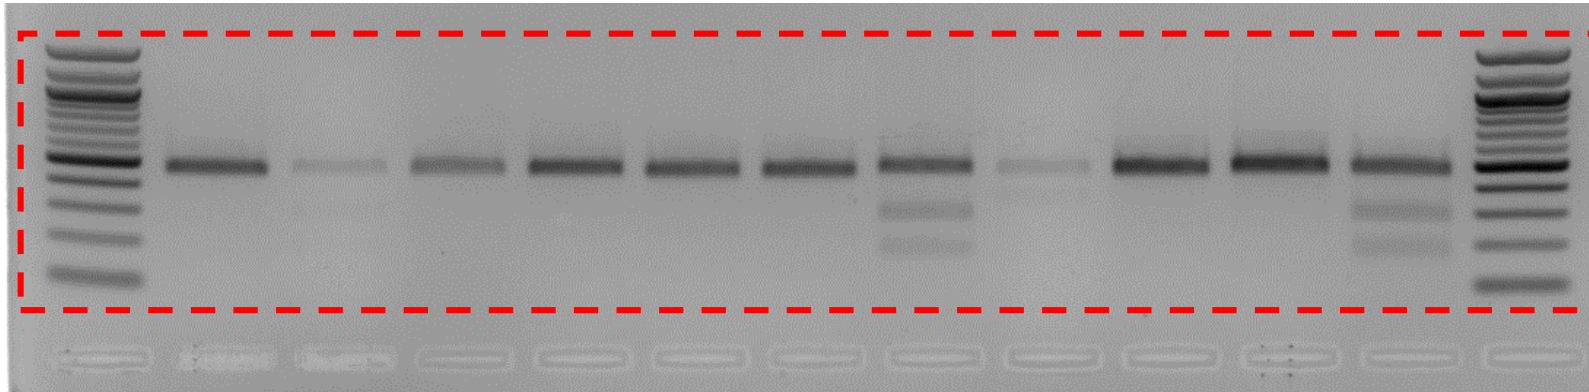

Original gel for Figure 1 (lower panel) "PCR digest gel 2% Agarose"
